# Supplementary material for: Association of Soluble Suppression of Tumorigenesis-2 (ST2) with Endothelial Function in Patients with Ischemic Heart Failure
Source: PubMed Central journal article supplement (PMC7764062; doi:10.3390/ijms21249385), 2020-12-09
Supplement: ijms-21-09385-s001.pdf [file ijms-21-09385-s001.pdf]

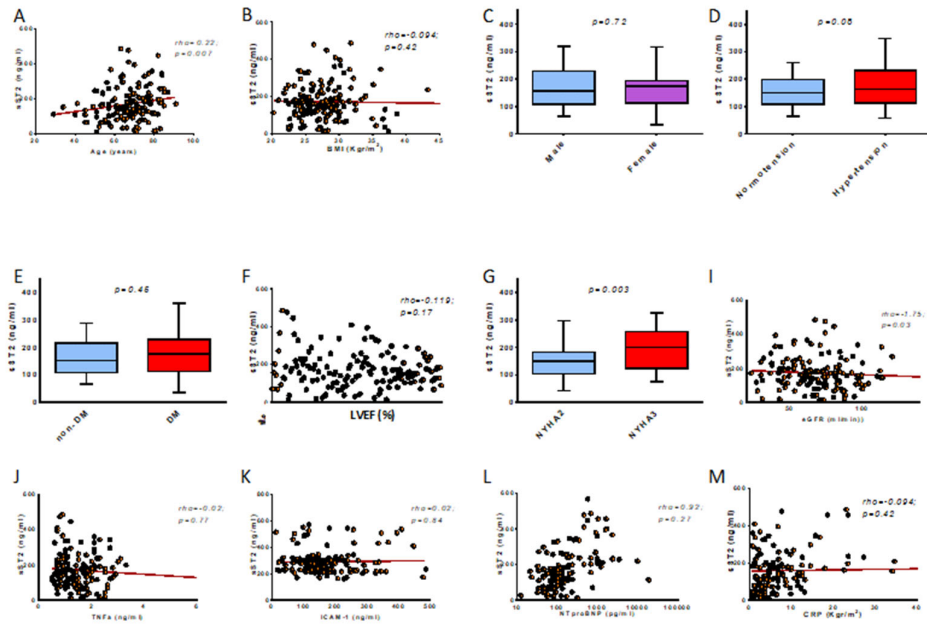

**Supplementary Figure 1:** Multi-panel figure (A–K) showing how sST2 levels are associated with continuous and categorical variables in the heart failure group. Box-plots are used for categorical variables and scatter-dots graphs for continuous variables. sST2: Soluble Suppression of Tumorigenesis-2; BMI: Body mass index; DM: Diabetes mellitus; LVEF: Left ventricle ejection fraction; NYHA: New York Heart Association; eGFR: estimated Glomerular Filtration rate; TNF $\alpha$ : Tumor necrosis factor alpha; NTproBNP: N terminal pro B type natriuretic peptide; CRP: C reactive protein.
